# Supplementary material
Source: ML conference proceedings conference paper supplement (https://proceedings.neurips.cc/paper_files/paper/2022/hash/a0a53fefef4c2ad72d5ab79703ba70cb-Abstract.html)
Supplement: Supplementary file 1 [file a0a53fefef4c2ad72d5ab79703ba70cb-Supplemental-Conference.zip]

Archive with 3 entries (3 files):
- one_model_to_edit_them_all_fre-Supplementary Material.mp4
- __MACOSX/._one_model_to_edit_them_all_fre-Supplementary Material.mp4
- FFCLIP_appendix.pdf
